# Supplementary material for: An Improved Test Method for Assaying the Inhibition of Bioflavonoids on Xanthine Oxidase Activity in vitro
Source: PubMed Central journal article supplement (PMC11625940; doi:10.1002/open.202400127), 2024-09-09
Supplement: OPEN-13-e202400127-s001.pdf [file OPEN-13-e202400127-s001.pdf]

# ChemistryOpen

Supporting Information

## **An Improved Test Method for Assaying the Inhibition of Bioflavonoids on Xanthine Oxidase Activity *in vitro***

Yuanyong Yao,\* Tao Wu, Meng Zhang, Daihua Fu, Hai Yang, and Shixue Chen\*

## Supplementary Material

### An improved test method for assaying the inhibition of bioflavonoids on xanthine oxidase activity *in vitro*

Yuanyong Yao <sup>\* [a][b]</sup>, Tao Wu <sup>[b]</sup>, Meng Zhang <sup>[b]</sup>, Daihua Fu <sup>[b][c]</sup>, Hai Yang <sup>[b]</sup>, Shixue Chen <sup>[b] \*</sup>

<sup>[a]</sup> State Ethnic Affairs Commission Key Development Laboratory of Chinese Veterinary Medicine & National and Local Joint Engineering Center of Chinese Veterinary Medicine Separation and Purification Technology, Tongren Vocational and Technical University, Tongren 554300 (China)

<sup>[b]</sup> Institute of Material and Chemical Engineering, Tongren University, Tongren 554300 (China)

<sup>[c]</sup> Key Laboratory of Medicinal Chemistry for Natural Resource of Ministry of Education and Yunnan University, Kunming 650091 (China)

\* Correspondence:

Yuanyong Yao

E-mail: chyuyy@gztrc.edu.cn (Y. Y.);

Shixue Chen

E-mail: Tongrencsx01@126.com (C. S).

**Keywords:** Test method; Xanthine oxidase; Bioflavonoids; In vitro inhibition

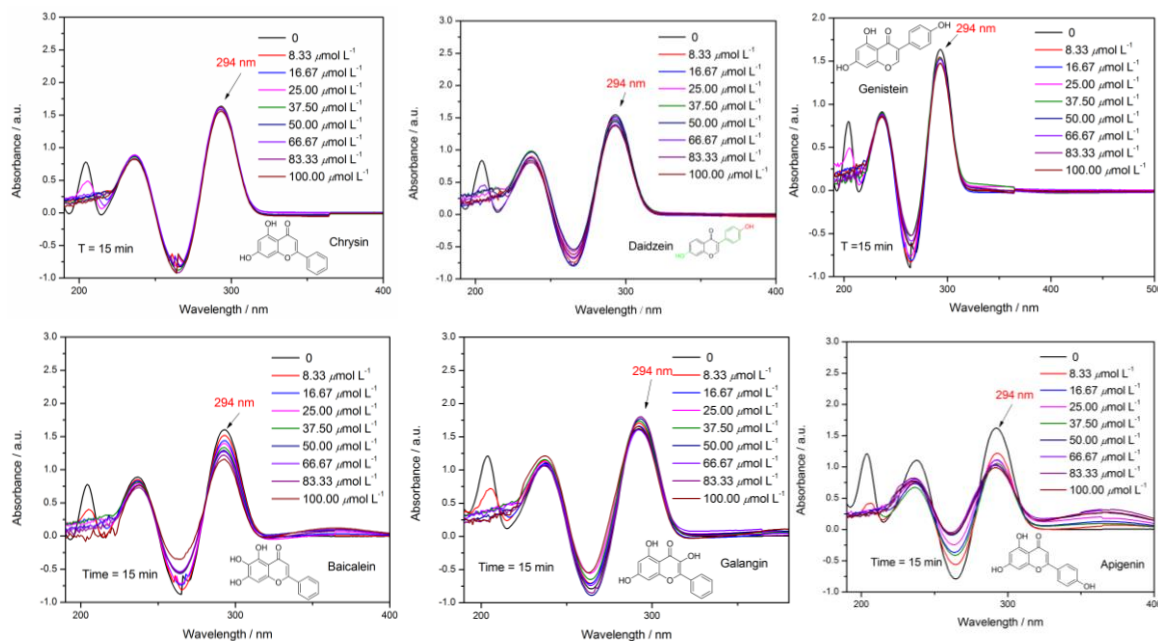

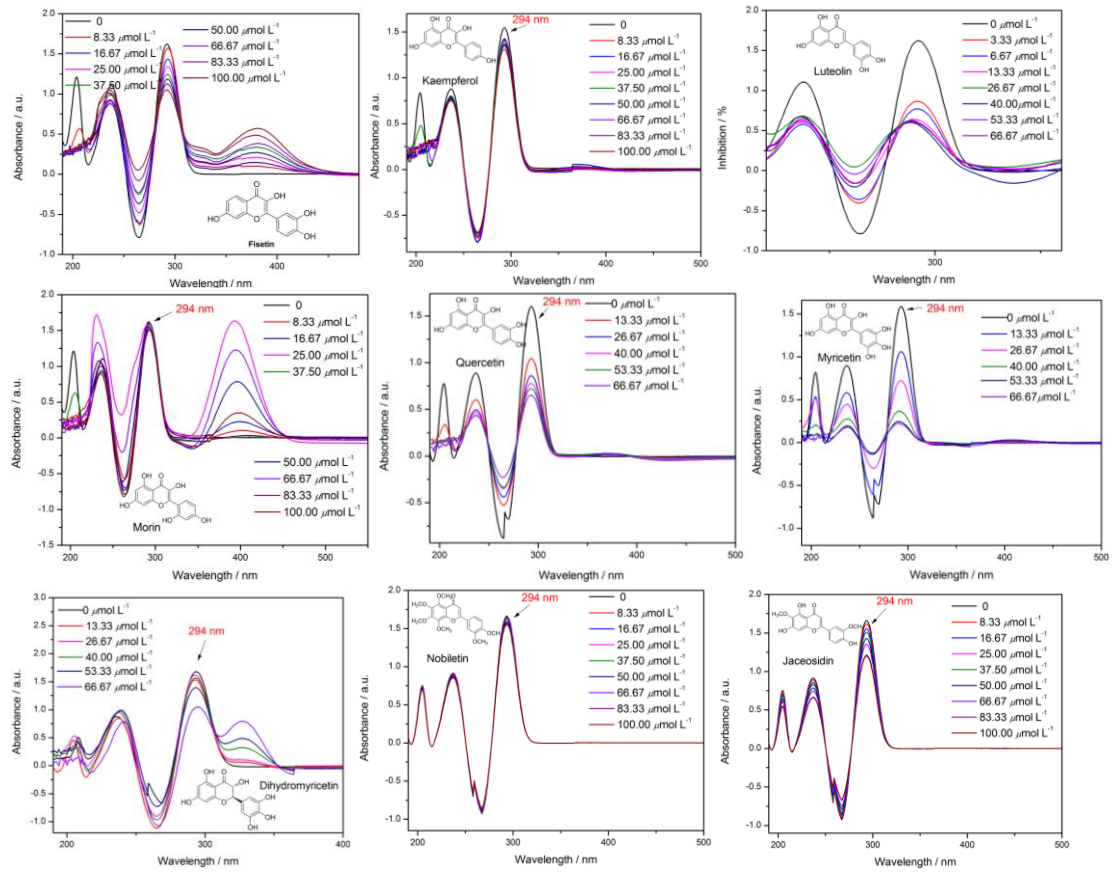

**Fig S1** UV spectrums of bioflavonoids inhibiting XOD in vitro
